# Supplementary material
Source: ML conference proceedings conference paper supplement (https://www.ecva.net/papers/eccv_2020/papers_ECCV/html/123570562_ECCV_2020_paper.php)
Supplement: Supplementary file 3 [file 123570562-supp.zip]

Archive with 4 entries (4 files):
- eccv2020_bnas_suppmat.pdf
- __MACOSX/._eccv2020_bnas_suppmat.pdf
- comb_grads.gif
- __MACOSX/._comb_grads.gif
