# Supplementary material
Source: ML conference proceedings conference paper supplement (https://www.ecva.net/papers/eccv_2020/papers_ECCV/html/123570562_ECCV_2020_paper.php)

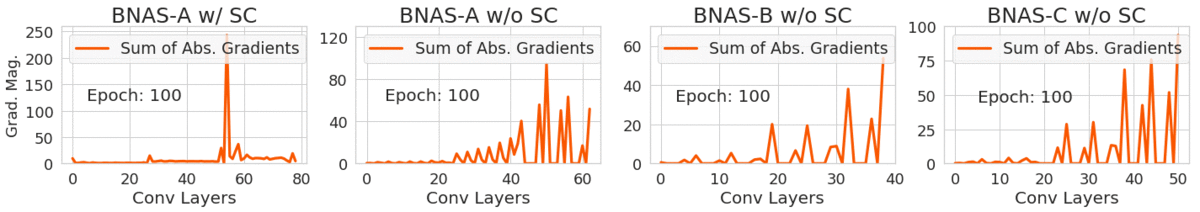

Supplement: Supplementary file 3 [file 123570562-supp.zip › comb_grads.gif]
